# Supplementary material for: CK2-dependent phosphorylation of occludin regulates the interaction with ZO-proteins and tight junction integrity
Source: PubMed Central journal article supplement (PMC3695765; doi:10.1186/1478-811x-11-40), 2013-06-10
Supplement: 1478-811X-11-40-S3.pdf [file 1478-811X-11-40-S3.pdf]

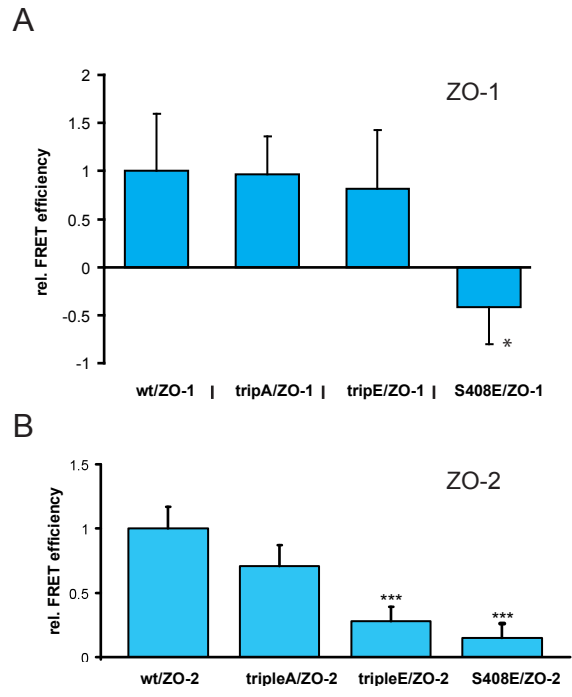

Fig. 3
